# Supplementary material
Source: ML conference proceedings conference paper supplement (https://openaccess.thecvf.com/content/CVPR_2019/html/Mun_Streamlined_Dense_Video_CVPR_2019_paper.html)
Supplement: Supplementary file 1 [file Mun_Streamlined_Dense_Video_CVPR_2019_supplemental.pdf]

# Streamlined Dense Video Captioning

## Supplementary Material

Jonghwan Mun<sup>1,5</sup> Linjie Yang<sup>2</sup> Zhou Ren<sup>3</sup> Ning Xu<sup>4</sup> Bohyung Han<sup>5</sup>

<sup>1</sup>POSTECH <sup>2</sup>ByteDance AI Lab <sup>3</sup>Wormpex AI Research <sup>4</sup>Amazon Go <sup>5</sup>Seoul National University

### A. Details of Event RNN

As described in Section 3.4 of the main paper, the event RNN is in charge of generating a description given an event and a context information, and returning features for the generated captions. This section discusses the caption generation process of the event RNN in detail.

Following [A1], we provide two kinds of event information,  $C3D(e)$  and  $Vis(e)$ , to the event RNN, where  $C3D(e)$  is a set of segment-level feature descriptors in an interval of an event  $e$ , and  $Vis(e)$  is a visual representation obtained from the event proposal network, SST. We first set an initial hidden state of the event RNN to the context vector of episode  $r$  given by the episode RNN. Then, at each time step of the event RNN, we perform Temporal Dynamic Attention (TDA) to obtain an attentive segment-level feature from  $C3D(e)$ , followed by Context Gating (CG) to adaptively model relative contributions of the attentive segment-level feature and the visual feature and return a gated event feature. Based on the gated event feature, the event RNN generates a word, and returns the hidden state as the caption feature  $g$  when generating the END token .

The whole caption generation process in the event RNN is summarized by the following sequence of operations:

$$h_0^e = r, \quad (1)$$

$$x_t = W_{\text{wemb}} w_t, \quad (2)$$

$$z_t = \text{TDA}(C3D(e), \text{Vis}(e), h_{t-1}^e), \quad (3)$$

$$o_t = \text{CG}(z_t, \text{Vis}(e), x_t, h_{t-1}^e), \quad (4)$$

$$h_t^e = \text{LSTM}_e(o_t, x_t, h_{t-1}^e), \quad (5)$$

$$p_t = \text{Softmax}(W_p h_t^e), \quad (6)$$

where  $W_{\text{wemb}}$  and  $W_p$  are learnable parameters,  $h^e$  means a hidden state of  $\text{LSTM}_e$  in the event RNN, and  $w_t$ ,  $x_t$ ,  $z_t$ ,  $o_t$  and  $p_t$  denote an input word, a word embedding vector, an attentive segment-level feature vector, a gated event feature vector and a probability distribution over vocabulary at time  $t$ , respectively. At time step  $t$ , given an event with  $S$

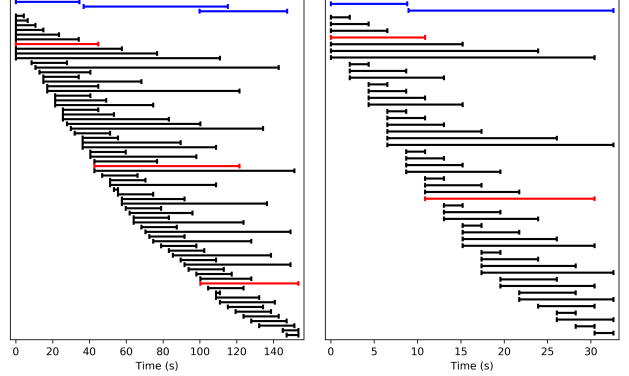

Figure A. Examples of the selected event proposals (**red**) out of the candidates (**black**) in the proposed event sequence generation network and the ground-truth events (**blue**).

segments, TDA computes the attentive vector  $z_t$  by

$$\alpha_s^t = W_\alpha \tanh(W_c C3D(e_s) + W_v \text{Vis}(e) + W_h h_{t-1}^e), \quad (7)$$

$$a_s^t = \frac{\exp(\alpha_s^t)}{\sum_{s=1}^S \exp(\alpha_s^t)}, \quad (8)$$

$$z_t = \sum_{s=1}^S a_s^t C3D(e_s), \quad (9)$$

where  $W_\alpha$ ,  $W_c$ ,  $W_v$  and  $w_h$  are learnable parameters, and  $e_s$  indicates the  $s^{\text{th}}$  segment in event  $e$ . Once obtaining the attentive segment-level feature, CG computes the gating vector  $k_t$  and the gated event vector  $o_t$  as follows:

$$\bar{z}_t = \tanh(W_z z_t), \quad (10)$$

$$\bar{v} = \tanh(W_{\bar{v}} \text{Vis}(e)), \quad (11)$$

$$k_t = \sigma(W_k [\bar{z}; \bar{v}; x_t; h_{t-1}^e]), \quad (12)$$

$$o_t = [(1 - k_t) \odot \bar{z}_t; k_t \odot \bar{v}], \quad (13)$$

where  $W_z$ ,  $W_{\bar{v}}$  and  $W_k$  are learnable parameters,  $\sigma$  is a sigmoid function,  $[\cdot; \cdot]$  denotes vector concatenation and  $\odot$  means element-wise multiplication.

## **B. Visualization of Event Selection**

Fig. A illustrates the event selection results. Our proposed event sequence generation network successfully identifies the event proposals out of the candidates, which highly overlap with the ground-truths.

## **References**

- [A1] Jingwen Wang, Wenhao Jiang, Lin Ma, Wei Liu, and Yong Xu. Bidirectional attentive fusion with context gating for dense video captioning. In *CVPR*, 2018.
